# Supplementary material
Source: ML conference proceedings conference paper supplement (https://openreview.net/forum?id=0N8jUH4JMv6)
Supplement: supplementary_material [file attachment]

## Code Link:

<https://www.dropbox.com/s/up0s1jbppe35td2/Code.zip?dl=0>
